# Supplementary material for: Characteristics of Soil Arsenic Contamination and the Potential of Pioneer Plants for Arsenic Remediation in Gold Mine Tailings
Source: MDPI journal article supplement (doi:10.3390/toxics11121025), 2023-12-16
Supplement: s1 [file s1]

# Supplementary Materials: Characteristics of Soil Arsenic Contamination and the Potential of Pioneer Plants for Arsenic Remediation in Gold Mine Tailings

Lei Han, Yunmeng Zhai, Rui Chen, Yamin Fan, Zhao Liu, Yonghua Zhao, Risheng Li and Longfei Xia

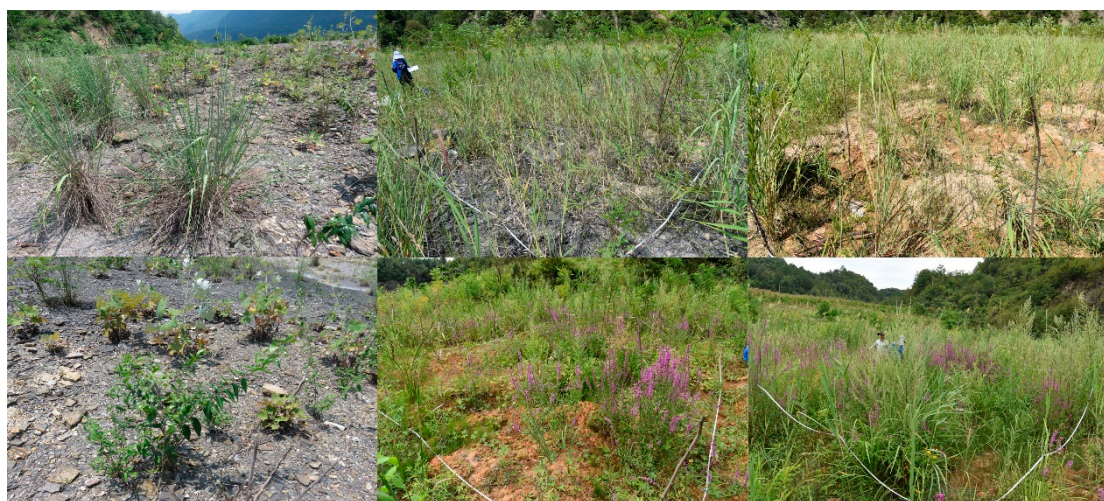

**Figure S1.** Growth of dominant vegetation in the study area.

**Table S1.** Pioneer plant species in the study area.

| Plant name                                         | Genus                | Family         | Lifeform |
|----------------------------------------------------|----------------------|----------------|----------|
| <i>Typha orientalis</i> C. Presl                   | Typha Linn.          | Typhaceae      | Herb     |
| <i>Lythrum salicaria</i> L.                        | Lythrum L.           | Lythraceae     | Herb     |
| <i>Oenanthe javanica</i> (Blume) DC.               | Oenanthe L.          | Apiaceae       | Herb     |
| <i>Equisetum ramosissimum</i> Desf.                | Equisetum L.         | Equisetaceae   | Herb     |
| <i>Phragmites australis</i> (Cav.) Trin. ex Steud. | Phragmites           | Poaceae        | Herb     |
| <i>Imperata cylindrica</i> (L.) P. Beauv.          | Imperata Cyr.        | Poaceae        | Herb     |
| <i>Eleusine indica</i> (L.) Gaertn.                | Eleusine Gaertn.     | Poaceae        | Herb     |
| <i>Setaria viridis</i> (L.) P. Beauv.              | Beauv. Ess. Agrost.  | Poaceae        | Herb     |
| <i>Bothriochloa ischaemum</i> (L.) Keng            | Bothriochloa Kuntze  | Poaceae        | Herb     |
| <i>Sophora davidii</i> Kom. ex Pavol               | Styphnolobium Schott | Leguminosae    | Shrub    |
| <i>Melilotus officinalis</i> (L.) Pall.            | Melilotus Mill.      | Leguminosae    | Herb     |
| <i>Sonchus wightianus</i> DC.                      | Sonchus              | Asteraceae     | Herb     |
| <i>Conyza canadensis</i> (L.) Cronq.               | ConyzaLess.          | Asteraceae     | Herb     |
| <i>Erigeron annuus</i> (L.) Pers.                  | Erigeron L.          | Asteraceae     | Herb     |
| <i>Periploca sepium</i> Bunge                      | Periploca            | Asclepiadaceae | Shrub    |

**Table S2.** The classification of Pi and PERI.

| Pi              | Pollution level  | Er                  | Degree of ecological risk      |
|-----------------|------------------|---------------------|--------------------------------|
| $Pi \leq 1$     | No pollution     | $Ei < 40$           | Low ecological risk            |
| $1 < Pi \leq 2$ | Sight pollution  | $40 \leq Ei < 80$   | Moderate ecological risk       |
| $2 < Pi \leq 3$ | Light pollution  | $80 \leq Ei < 160$  | Considerable ecological risk   |
| $3 < Pi \leq 5$ | Middle pollution | $160 \leq Ei < 320$ | Very high ecological risk      |
| $Pi \geq 5$     | Severe pollution | $Ei \geq 320$       | Extremely high ecological risk |

**Table S3.** Soil nutrient classifications in China.

| Level                     | 1<br>Very rich | 2<br>Rich     | 3<br>Moderate | 4<br>Lack of | 5<br>Very lacking | 6<br>Extremely lacking |
|---------------------------|----------------|---------------|---------------|--------------|-------------------|------------------------|
| SOM(g·kg <sup>-1</sup> )  | >40.00         | 30.00-40.00   | 20.00-30.00   | 10.00-20.00  | 6.00-10.00        | <6.00                  |
| STN (g·kg <sup>-1</sup> ) | >2.00          | 1.50-2.00     | 1.00-1.50     | 0.75-1.00    | 0.50-0.75         | <0.50                  |
| SAN(mg·kg <sup>-1</sup> ) | >150.00        | 120.00-150.00 | 90.00-120.00  | 60.00-90.00  | 30.00-60.00       | <30.00                 |
| STP(g·kg <sup>-1</sup> )  | >1.00          | 0.80-1.00     | 0.60-0.80     | 0.40-0.60    | 0.20-0.40         | <0.20                  |
| SAP(mg·kg <sup>-1</sup> ) | >40.00         | 20.00-40.00   | 10.00-20.00   | 5.00-10.00   | 3.00-5.00         | <3.00                  |
| STK(g·kg <sup>-1</sup> )  | >20.00         | 15.00-20.00   | 10.00-15.00   | 5.00-10.00   | 3.00-5.00         | <3.00                  |
| SAK(mg·kg <sup>-1</sup> ) | >200           | 150.00-200.00 | 100.00-150.00 | 50.00-100.00 | 30.00-50.00       | <30.00                 |

**Table S4.** Soil As bioactivity activity coefficient.

| Biological activity coefficient | K <sub>1</sub> | K <sub>2</sub> | K <sub>3</sub> |
|---------------------------------|----------------|----------------|----------------|
| As                              | 0.36           | 0.21           | 0.43           |

**Table S5.** Classification of pioneer plants.

| Classification    | Plant species                                                                                                                                                                                                                                                             |
|-------------------|---------------------------------------------------------------------------------------------------------------------------------------------------------------------------------------------------------------------------------------------------------------------------|
| Accumulators      | <i>Lythrum salicaria</i> L.<br><i>Equisetum ramosissimum</i> Desf.                                                                                                                                                                                                        |
| Root compartments | <i>Typha orientalis</i> C. Presl<br><i>Oenanthe javanica</i> (Blume) DC.<br><i>Phragmites australis</i> (Cav.) Trin. ex Steud.<br><i>Imperata cylindrica</i> (L.) P. Beauv.<br><i>Eleusine indica</i> (L.) Gaertn.<br><i>Setaria viridis</i> (L.) P. Beauv.               |
| Excluders         | <i>Bothriochloa ischaemum</i> (L.) Keng<br><i>Sophora davidii</i> Kom. ex Pavol<br><i>Melilotus officinalis</i> (L.) Pall.<br><i>Sonchus wightianus</i> DC.<br><i>Conyza canadensis</i> (L.) Cronq.<br><i>Erigeron annuus</i> (L.) Pers.<br><i>Periploca sepium</i> Bunge |
